# Supplementary material
Source: PubMed Central journal article supplement (PMC2912181)
Supplement: JCI39679sd.pdf [file JCI39679sd.pdf]

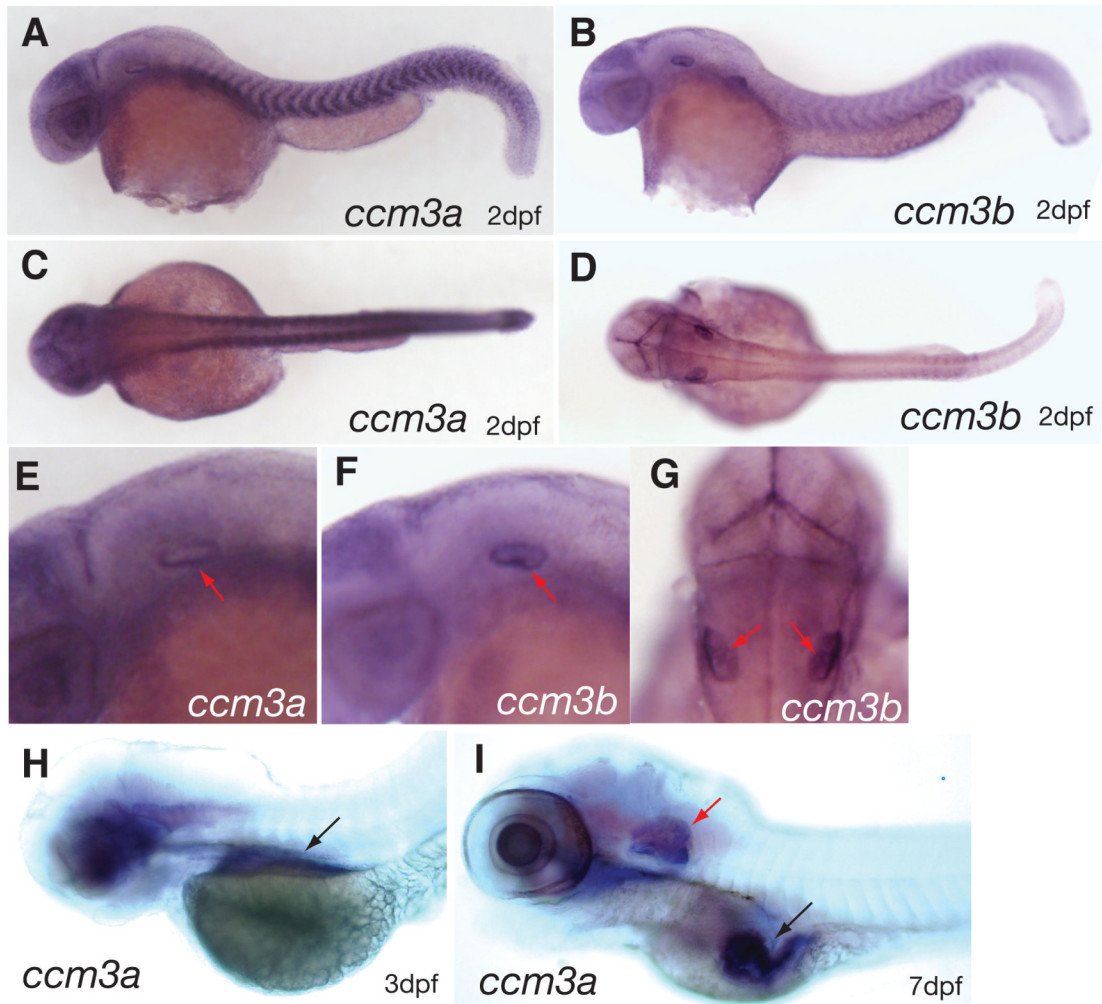

**Supplemental Figure 1. Expression of *ccm3* genes in zebrafish embryos.** Shown are in situ hybridization studies for *ccm3a* and *ccm3b*. Both *ccm3a* (A, lateral view and C, dorsal view) and *ccm3b* (B, lateral view and D, dorsal view) are expressed in the somites and head of 2dpf embryos. *ccm3a* (E and I) and *ccm3b* (B, D, F and G) are also strongly expressed in the developing ear. In 3dpf (H) and 7dpf (I) embryos, *ccm3a* expression is detected in the developing intestine (arrow).

Supplemental Figure 2 Zheng et al.

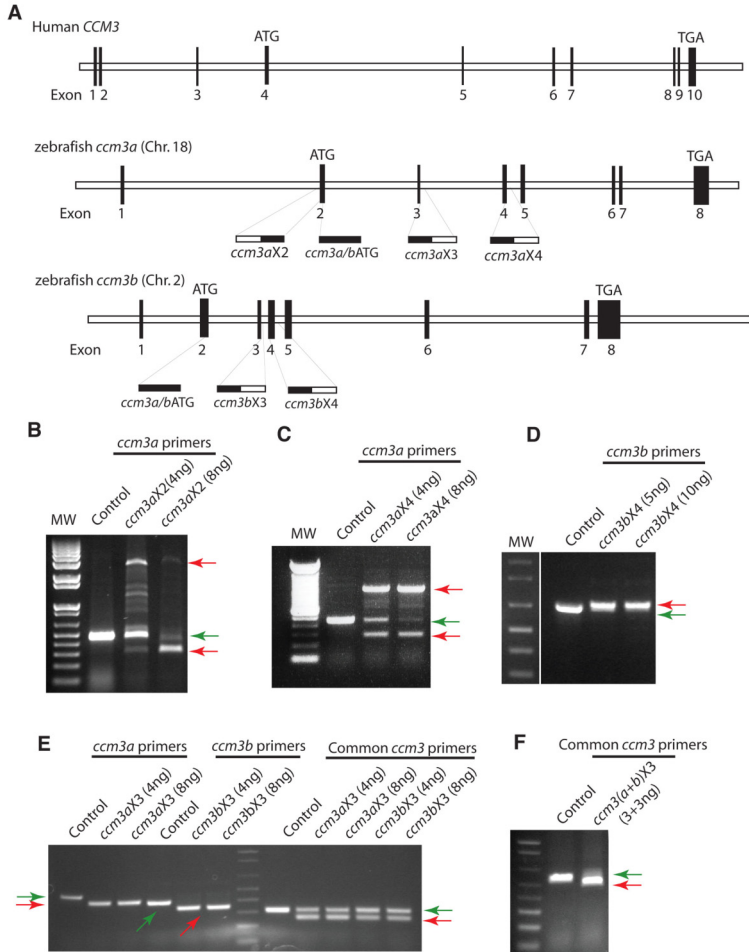

**Supplemental Figure 2. Morpholino knockdown of *ccm3* genes in zebrafish embryos.** (A) The zebrafish *ccm3a* and *ccm3b* gene structures are shown in comparison to that of the human *CCM3* gene. The binding sites for morpholinos targeting exon splice sites and the ATG of the zebrafish *ccm3* genes are shown. *ccm3aX2*, *ccm3aX3*, and *ccm3aX4* target the acceptor site of exon 2 and the donor sites of exons 3 and 4 of the *ccm3a* gene respectively. *ccm3bX3* and *ccm3bX4* target the donor sites of exons 3 and 4 of the *ccm3b* gene. *ccm3(a+b)ATG* targets a conserved sequence in the 5'-UTR of the *ccm3a* and *ccm3b* genes to block the translation of both genes simultaneously. Note that zebrafish *ccm3* exon 3 is equivalent to human *CCM3* exon 5. (B) *ccm3aX2* causes the retention of intron 1 (top red arrow) or deletion of exon 2 (bottom red arrow) of the *ccm3a* gene with introduction of a premature stop codon (not shown). The green arrow indicates the small amount of residual wild-type transcript detected following 4ng and 8ng morpholino injection. (C) *ccm3aX4* causes the retention of intron 4 (top red arrow) or deletion of exons 3 and 4 (bottom red arrow) of the *ccm3a* gene with introduction of a premature stop codon (not shown). The green arrow indicates the residual wild-type transcript detected following 4ng and 8ng injection. (D) *ccm3bX4* causes partial retention of intron 4 (top arrow) in the *ccm3b* gene and introduces a premature stop codon (not shown). The green arrow indicates the small amount of residual wild-type transcript detected following 4ng and 8ng injection. (E) *ccm3aX3* and *ccm3bX3* morpholinos target the donor sites of exon 3 in *ccm3a* and *ccm3b* respectively, and result in *ccm3a* or *ccm3b* transcripts that are in frame but lack 54 bp that encode 18 amino acids (red arrows). The amplification of total *ccm3* transcripts following 4 and 8 ng injections of *ccm3aX3* and *ccm3bX3* morpholinos is shown on the right. (F) Simultaneous targeting of exon 3 in *ccm3a* and *ccm3b* is shown. The red arrow indicates amplification of truncated transcripts lacking exon 3 and the green arrow indicates the residual amount of wild-type *ccm3* transcripts.

Supplemental Figure 3 Zheng et al.

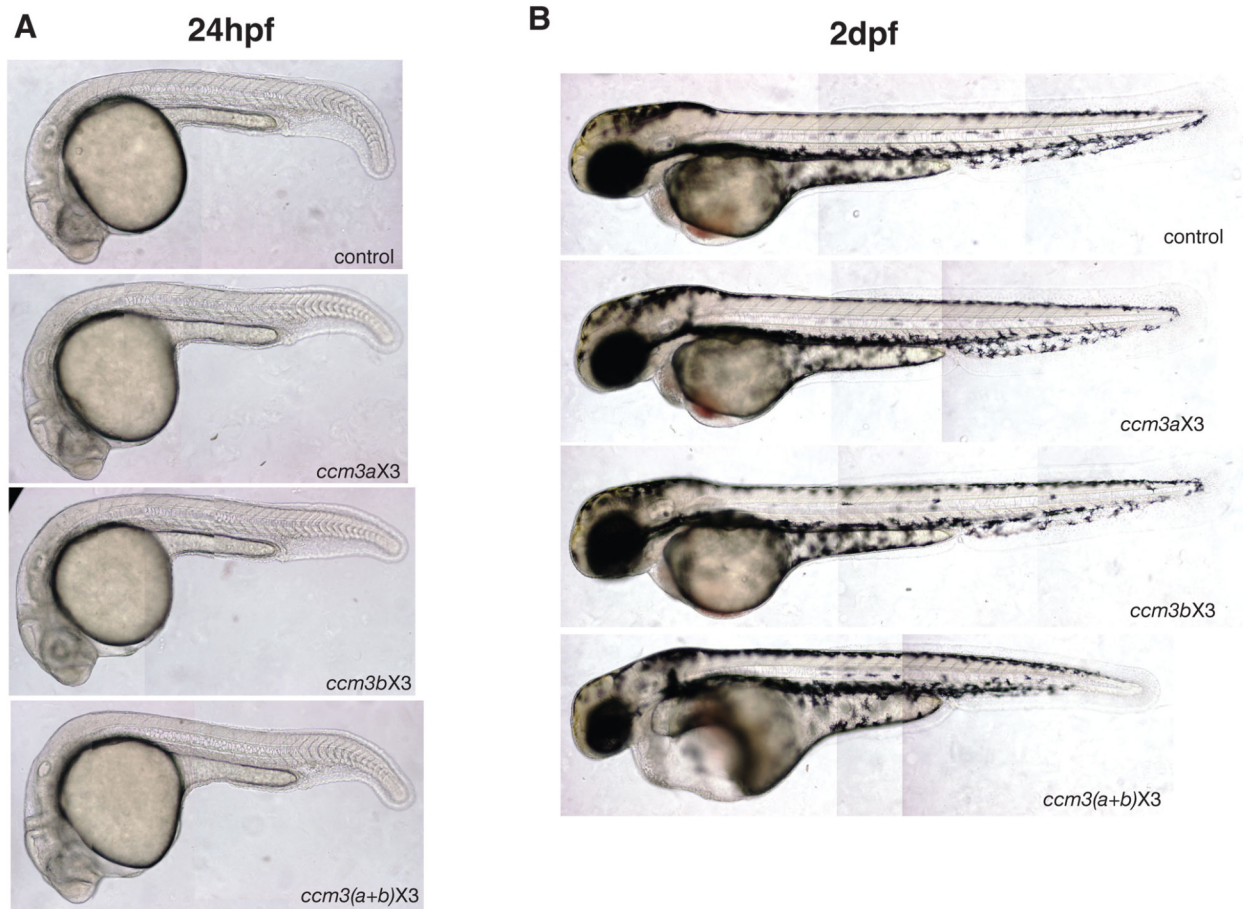

**Supplemental Figure 3. Morphology of zebrafish embryos expressing *ccm3* proteins lacking the 18 amino acids coded by exon 3.** Bright field of images of 24hpf (A) and 2dpf (B) zebrafish embryos injected with control, *ccm3aX3* (3ng/embryo), *ccm3bx3* (3ng/embryo) or the combination of *ccm3aX3* and *ccm3bX3* morpholinos are shown.

## Supplemental Figure 4 Zheng et al.

A

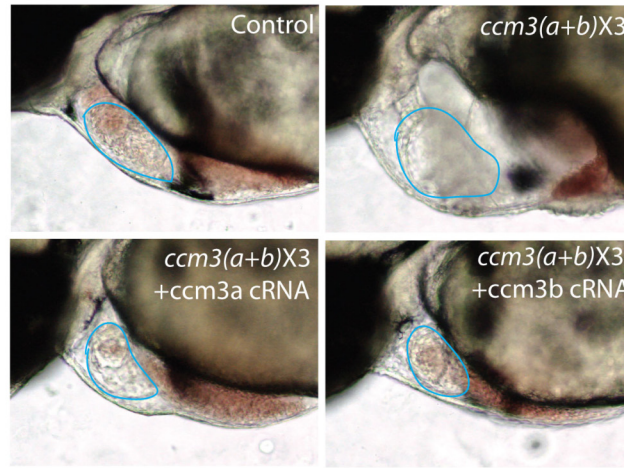

B

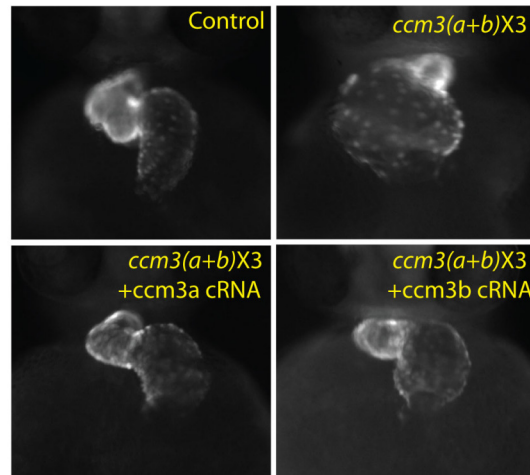

**Supplemental Figure 4. Rescue of the big heart phenotype conferred by loss of *ccm3* exon 3 with cRNAs encoding full length *ccm3a* or *ccm3b*.** Bright field (A) and fluorescence (B) images of the hearts of 48 hpf Tg (*i-fabp*:GFP) embryos following injection of control morpholino, *ccm3(a+b)*X3 morpholinos and *ccm3(a+b)*X3 morpholinos + cRNAs encoding full length *ccm3a* or *ccm3b* are shown.

Supplemental Figure 5 Zheng et al.

**A**

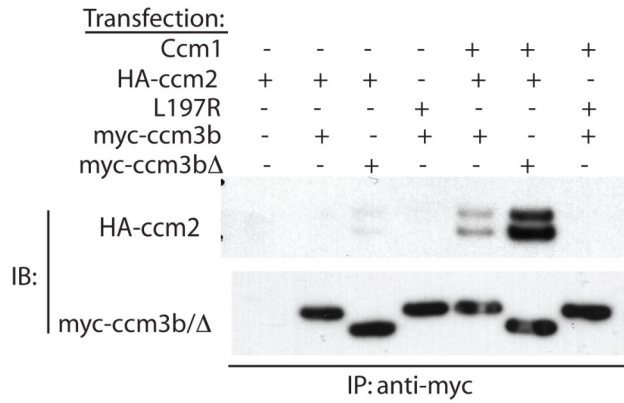

**B**

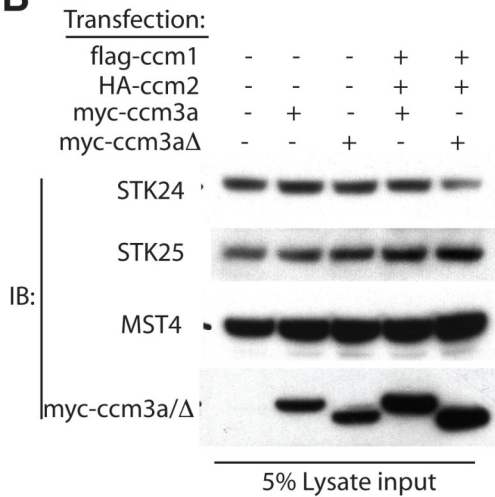

**C**

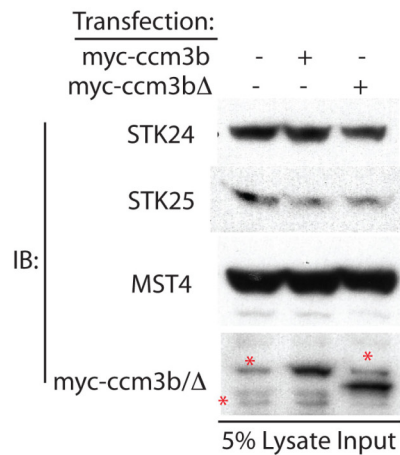

**Supplemental Figure 5. ccm3bD interacts with ccm1 and ccm2 but not with STKs.** (A) Co-immunoprecipitation of ccm1, ccm2 and ccm3b requires the ccm2 phosphotyrosine binding (PTB) domain but not exon 3 of ccm3. FLAG-ccm1, HA-ccm2 and myc-ccm3b were co-expressed in HEK293T cells and immunoprecipitations performed using anti-myc antibodies. ccm2L197R contains a point mutation in the PTB domain that blocks interaction with ccm1 {Kleaveland, 2009 #1121}. ccm3bD indicates ccm3b proteins lacking exon 3. (B) The expression levels of endogenous STK24, STK25, MST4, and heterologous ccm3a, ccm3aΔ in 5% of the lysate used for the co-immunoprecipitation experiments in Figure 3D are shown. (C) The expression levels of endogenous STK24, STK25, MST4, and heterologous ccm3b, ccm3bΔ in 5% of the lysate used for the co-immunoprecipitation experiments in Figure 3E are shown. Red asterisks indicate background bands present in all lanes.

**Supplemental Figure 6 Zheng et al.**

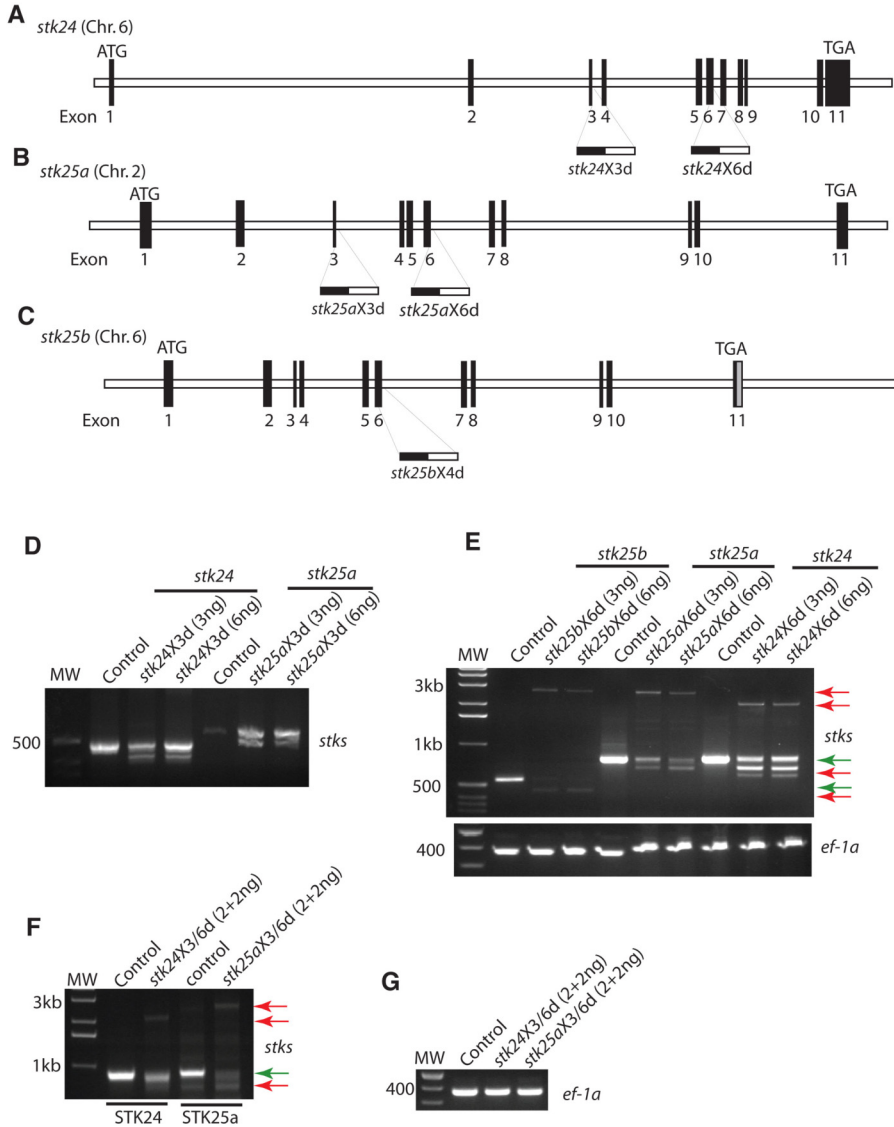

**Supplemental Figure 6. Morpholino knockdown of the *stk24* and *stk25* genes in zebrafish embryos.** (A-C) The zebrafish *stk24*, *stk25a* and *stk25b* genes are shown with the binding sites for morpholinos targeting the splice sites of the genes indicated. *stk24X3* and *stk24X6* target the donor sites of exon3 and exon 6 of *stk24* gene. *stk25aX3* and *stk25aX6* target the donor sites of exon3 and exon 6 of *stk25a* gene. *stk25bX6* targets the donor site of exon 6 of *stk25b* gene. The effect of these morpholinos on *stk24* and *stk25* gene expression was characterized using RT-PCR (D-G, below) and sequencing of the PCR products (not shown). (D) *stk24X3* and *stk25aX3* morpholinos drive partial deletion of exon 3 in *stk24* and *stk25b*. The mutant mRNAs are detected as the smaller bands relative to the control. (E) *stk24X6*, *stk25aX6* and *stk25bX6* morpholinos drive partial deletion of exon 6 and retention of intron 6 in *stk24*, *stk25a* and *stk25b*. Green arrows indicate bands amplified from wild-type transcripts and red arrows indicate those with either truncated (smaller) or intron-containing (larger) transcripts. (F) The morpholino combinations of *stk24X3* + *stk24X6* and *stk25aX3* + *stk25aX6* drive more efficient knock-down of *stk24* or *stk25* expression. (G) Expression of the control gene *ef1a* is unchanged in embryos injected with *stk24* and *stk25* morpholinos. The dosages of for each morpholino are indicated.

**Supplemental Figure 7 Zheng et al.**

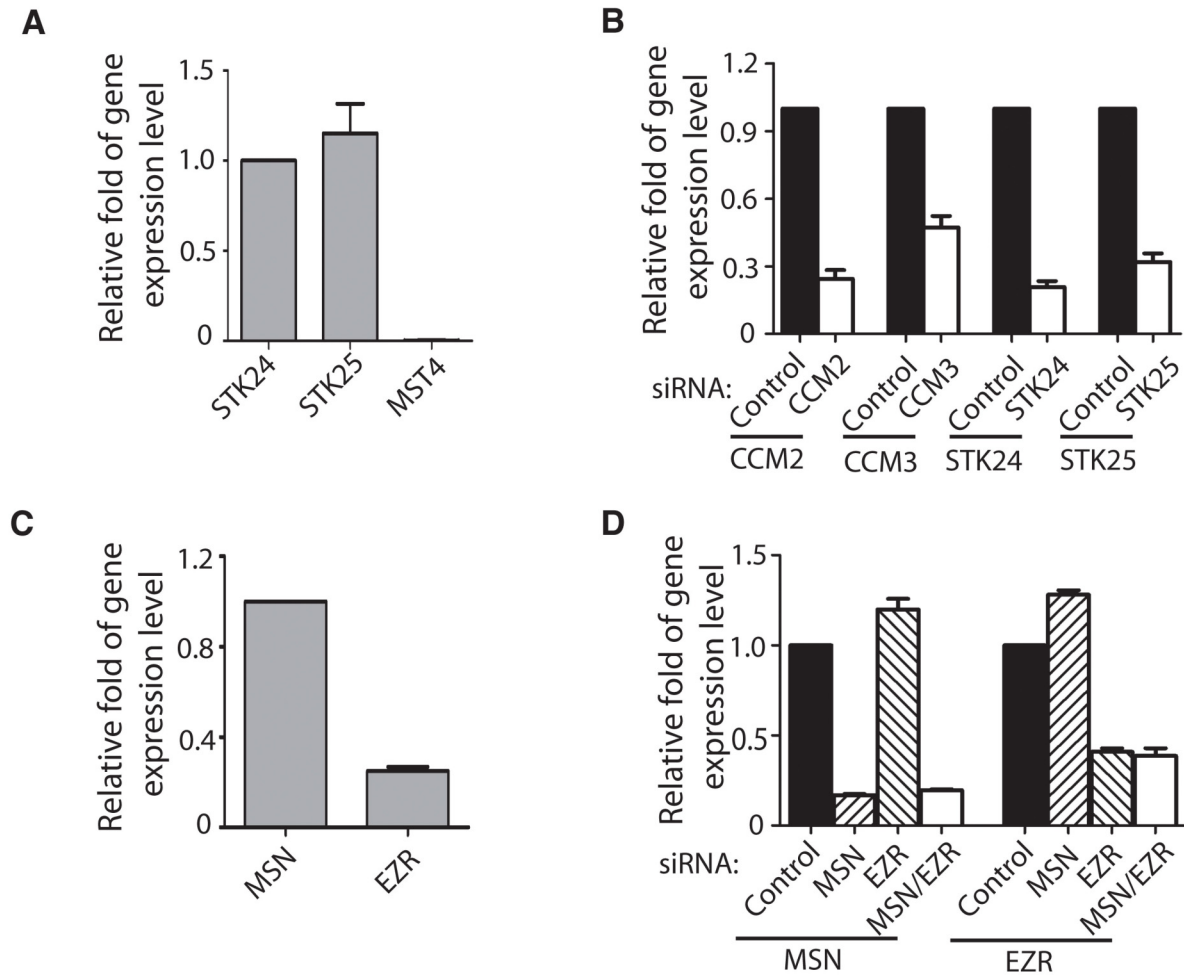

**Supplemental Figure 7. Expression and siRNA knockdown of GCK-III family STKs, Moesin and Ezrin in HMVECs.** (A) Relative expression level of *STK24*, *STK25* and *MST4* in HMVECS as detected with real-time RT-PCR. The expression levels were normalized to the level of *STK24*. Note that *STK24* and *STK25* are expressed at comparable level in HMVECs whereas *MST4* expression is not detectable. (B) The knockdown efficiency of siRNAs directed against *CCM2*, *CCM3*, *STK24* and *STK25*. HMVECs were transfected with 8nM of the indicated siRNAs using siPORT™ *Amine* Transfection Agent (Ambion) and total RNA harvested 2 days after transfection. Real-time RT-PCR analysis was performed to measure the gene expression level. The results represented the mean and SEM of two independent experiments. (C) Relative expression level of *MSN* and *EZR* in HMVECS as detected with real-time RT-PCR. The expression levels were normalized to the level of *MSN*. The expression level of *MSN* is 4 fold higher that of *EZR* in HMVECs. (D) The knockdown efficiency of siRNAs directed against *MSN* and *EZR*. HMVECs were transfected with 8nM of the indicated siRNAs and the expression levels of *MSN* and *EZR* measured as described in (B). Data shown in this figure are mean and SEM of 3 replicated experiments.
